# Supplementary material
Source: Springer Nature journal article supplement (https://www.springermedizin.de/resource/supplementary/13054_2009_8317_MOESM3_ESM.pdf/9731690)

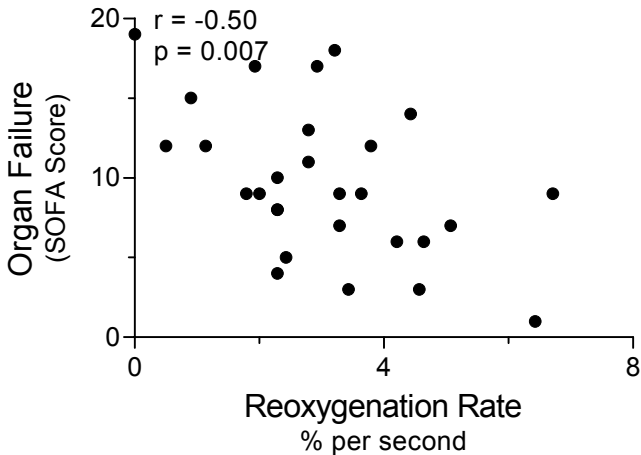

Supplement: MOESM3 [file 9731690]
